# Supplementary material
Source: PubMed Central journal article supplement (PMC3586277)

# Supporting Information

## Development of $^{18}\text{F}$ -Labeled Picolinamide Probes for PET Imaging of Malignant Melanoma

Hongguang Liu, Shuanglong Liu, Zheng Miao, Zixin Deng, Baozhong Shen, Xuechuan Hong, Zhen Cheng

### Compound 1

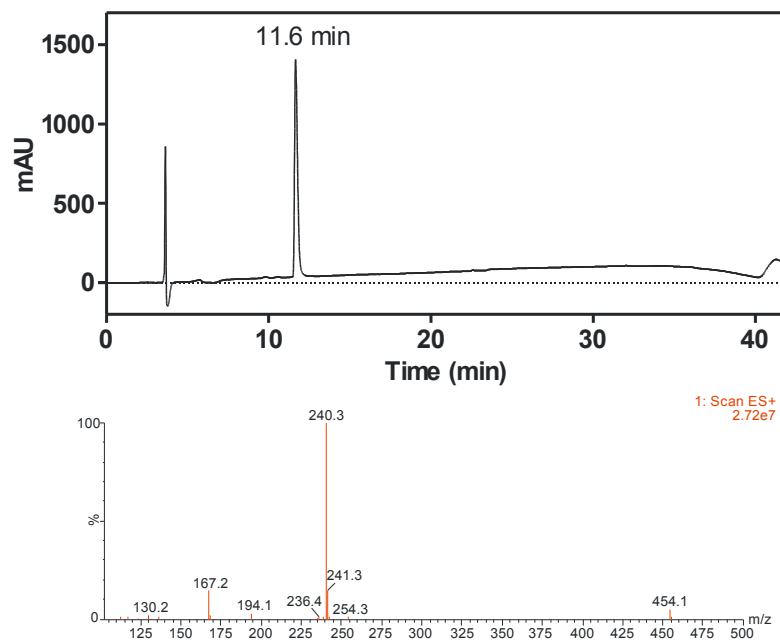

### Compound 2

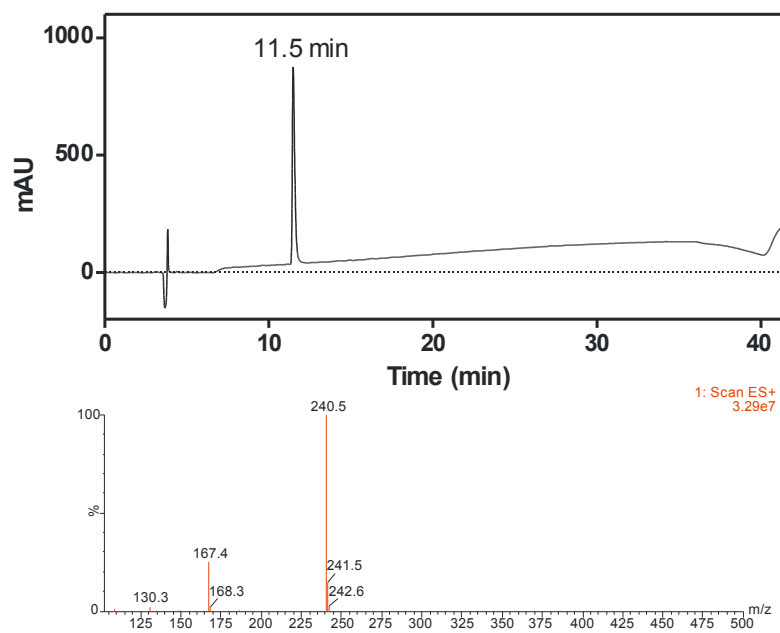

### Compound 3

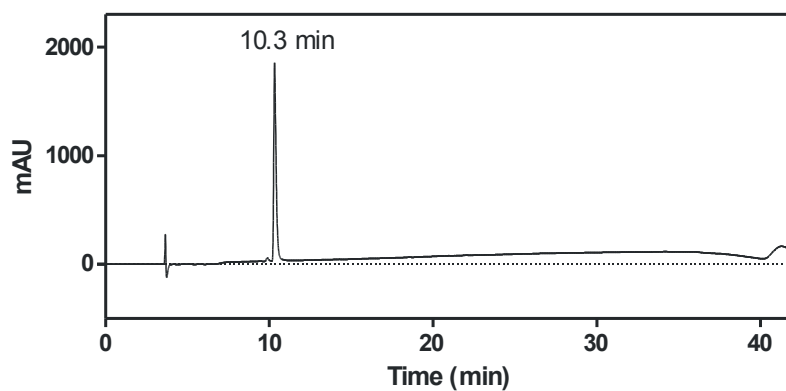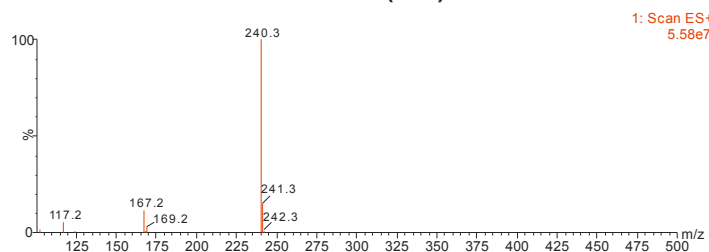

### Compound 4

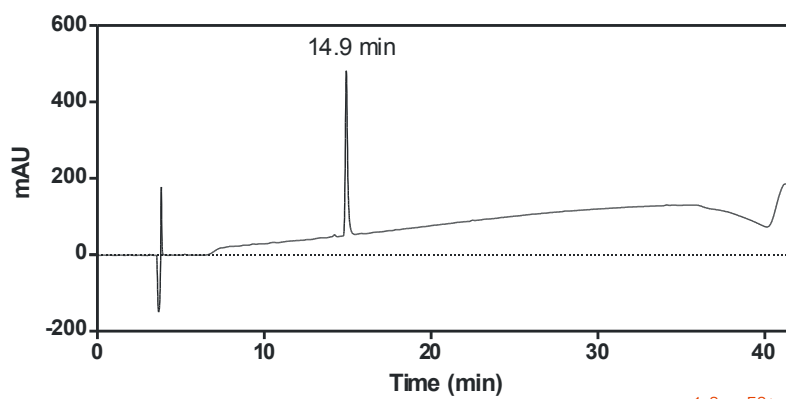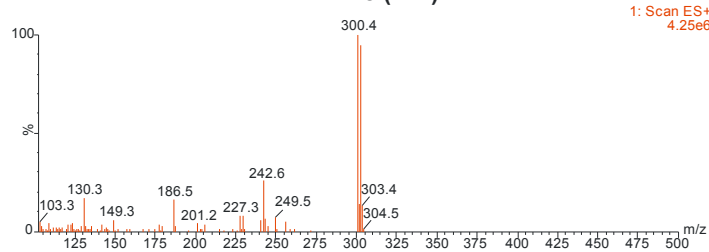

### Compound 5

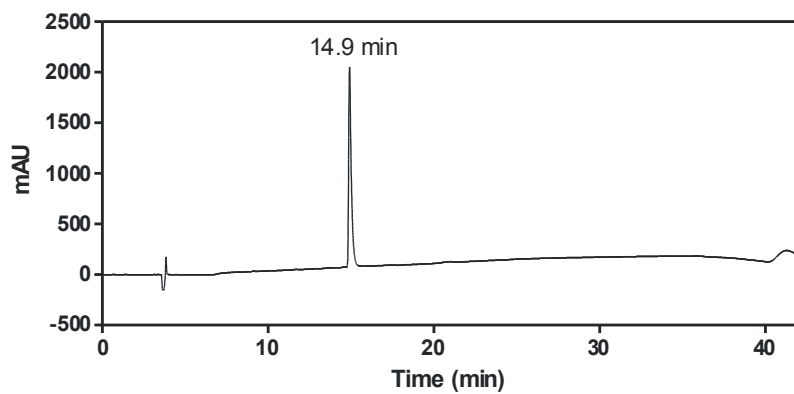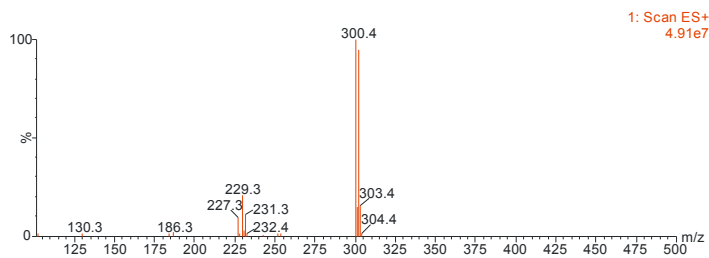

### Compound 6

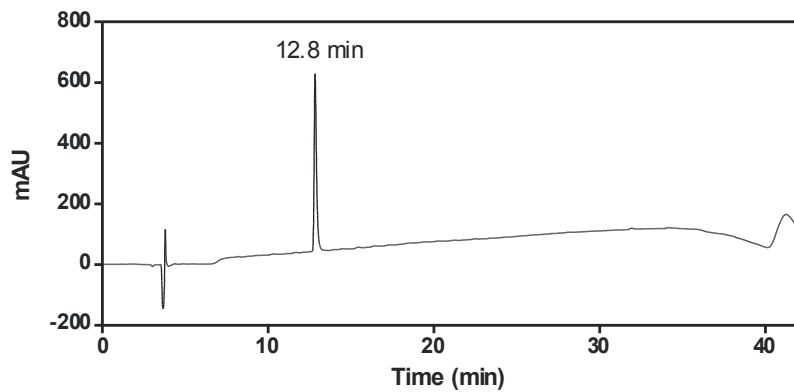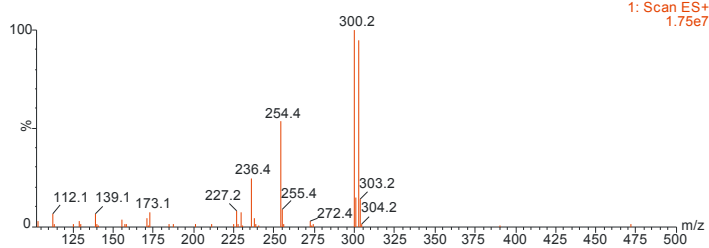

Supplement: NIHMS436224-supplement-1.pdf [file NIHMS436224-supplement-1.pdf]
